# Supplementary material
Source: publisher site journal article supplement (https://www.dovepress.com/article/558968)
Supplement: Supplementary file 1 [file 558968_TGES_Supplemental_Revised_09Dec2025%20CLEAN.docx]

# Supplementary material

Supplemental Table S1. Participant treatment experiences

|  | Frequency (N=28) | Representative Quotes (PRO version) |
| --- | --- | --- |
| Current Treatment is First Treatment, n (%) |  |  |
| Yes | 2 (7.1) |  |
| No | 26 (92.9) |  |
| *Reason for Recent Switch in Treatment, n (%)a* |  |  |
| No past treatments had worked for them | 12 (46.2) | “*Nothing I tried was effective enough*.” (version 1) |
| Encouraged by physician to change treatment | 4 (15.4) | *“[it was] the doctor’s recommendation to try it.”* (version 2) |
| Wanted to try different mode of treatment (e.g., injections instead of oral medication) | 3 (11.5) | *“I had tried creams a lot, and I don’t think that they worked very well for me, and so the one that I’m on right now is injection-based, and I think that these work very well […]”* (version 2) |
| Recent change in insurance provider | 2 (7.7) |  |
| Medication to prevent symptoms or potentially cure rather than symptom maintenance | 2 (7.7) | *“I was doing more of a reactive after-the-fact of having a migraine headache medicine, and I wanted more preventative.”* (version 2) |
| Joined a clinical trial | 2 (7.7) |  |
| Primary Treatment Goal for Previous Treatment, n (%)a |  |  |
| Generally minimizing symptoms | 4 (15.4) |  |
| *AD Goals, n (%)c* |  |  |
| Clear up their skin | 4 (30.7) | *“Mostly to clear my skin.”* (version 1) |
| Heal cracks on their hands | 3 (23.1) |  |
| Lessen pain | 2 (15.4) |  |
| Manage occasional flare-ups | 1 (7.7) | *“My previous goal was essentially to just minimize what I had and to make life just a little bit more easier day to day […] just kind of to get what I had severely under control.”* (version 2) |
| Eliminate outbreaks and itching | 1 (7.7) |  |
| Reduce the amount of treatment cream needed for relief | 1 (7.7) |  |
| *Migraine Goals, n (%)c* |  |  |
| Eliminate migraines completely | 6 (46.2) |  |
| Less frequent migraines | 2 (15.4) | *“It was just to try to minimize the migraines.”* (version 2) |
| Not have to cancel plans due to migraines | 1 (7.7) |  |
| Get relief without having to take a daily medication | 1 (7.7) | *“I just wanted relief, like I said, relief that wasn’t medication, over-the-counter on a daily basis.”* (version 2) |
| Current Primary Goal Different from Previous Primary Goal, n (%)a |  |  |
| Yes | 11 (42.3) |  |
| No | 15 (57.7) |  |
| *Reason for Different Primary Goal, n (%)a,b,c* |  |  |
| Eliminate or prevent condition (original goal: managing condition) | 4 (15.4) | *“Well the, the goal this time […] I would rather just clear it up for good so that I don’t even have, don’t even have flare-ups […] just cleared my hands up for good.”* (version 1) |
| Would settle for improvement in quality of life (original goal: eliminating migraine) | 2 (7.7) | *“Yes. Well, my goal has lessened, that is at one point, my goal was to make all the headaches go away, I have kind of given up on that and it’s okay, I’ll settle for something less than that, than all headaches going way…I would settle on quality of life […]”* (version 3) |
| Reduce impact of migraine on raising children (original goal: feeling better) | 2 (7.7) |  |
| Wanted to clear up all skin (original goal: clearing up hands) | 1 (3.8) |  |

AD = atopic dermatitis; PRO = patient-reported outcome.

a Among participants whose current treatment is not their first treatment.

b Among participants whose current primary treatment goal is different from their previous primary treatment goal.

c Participants with AD (n=13), participants with migraine (n=13).

Supplemental Table S2. TGES – Baseline comprehension and responses

|  | Frequency (n/N) | Representative Quotes (PRO Version) |
| --- | --- | --- |
| Instructions |  |  |
| Initial Impressions |  |  |
| *Positive* |  |  |
| Good | 25.0% (7/28) |  |
| Clear | 25.0% (7/28) | *“Well it was very clear in that it was, you know, the one treatment benefit that would be most important to you.”* (version 1) |
| Easy | 7.1% (2/28) |  |
| *Improvements* |  |  |
| Hard time picking 1 treatment goal | 21.4% (6/28) |  |
| Question was broad or vague | 33.3% (7/21)b,c | *“I think that it’s kind of a little vague, just because it’s just one goal that you have […] because when I first read it, I was like, I have no idea what my specific goal would be.”* (version 2). |
| Interpreted as intended | 82.1% (23/28) |  |
| *Suggested revisions* | 39.3% (11/28) |  |
| “Goal” vs. “Benefit” | 20.0% (3/15)b | “*So ‘goal’ seems kind of like an endpoint, and maybe ‘benefit’ is like the journey there, so maybe ‘benefit’ is better than ‘goal,’ […]*” (version 2) |
| Add specific examples | 22.7% (5/22)b,d | “*I don’t know the level of specific it wants. I would like [a] more specific example […]*” (version 2) |
| Item 1 |  |  |
| Interpreted as intended | 96.4% (27/28)a |  |
| *Easy to respond* |  |  |
| Yes | 85.7% (24/28) | *“[…] I think that the directions helped me come up with an answer pretty quickly.”* (version 2) |
| No | 50.0% (3/6)c | *“It might be a little vague because of how many different responses I’m wanting to give for it, […]”* (version 1) |
| *Confusion with question* |  |  |
| No | 85.2% (23/27) |  |
| Yes | 33.3% (2/6)c | *“Well, it’s kind of an ambiguous question.”* (version 1) |
| Prompted to revise initial responsee | 60.7% (17/28) |  |
| *Reason for revision* |  |  |
| Vague response | 28.6% (8/28) |  |
| Multiple goals | 25.0% (7/28) |  |
| No specific goal | 3.6% (1/28) |  |

PRO = patient-reported outcome; TGES = treatment goals evaluation scale.

a One participant misunderstood the instructions.

b Among participants who participated in Round 2 cognitive interviews (n=15).

c Among participants who participated in Round 1 cognitive interviews (n=6).

d Among participants who participated in Round 3 cognitive interviews (n=7).

e Revisions were prompted by individual interviewers; the level of specificity required to define a treatment goal is subjective and judgement of acceptable responses varied by interviewer. Responses and revisions are detailed in Table S-3 (Supplemental Material).

Supplemental Table S3. Item tracking matrix: TGES – Baseline

| TGES Item | Version 1 | Feedback from Interviews  (N=6) | Revisions based on feedback | Version 2 | Feedback from Interviews  (N=15) | Revisions based on feedback | Version 3  (N=7) |
| --- | --- | --- | --- | --- | --- | --- | --- |
| Overall Instructions | **Instructions:** Every person seeks treatment for their own reasons and has expectations of how the treatment will improve their lives. For this questionnaire, please think about the **one treatment benefit** that would be most important to you.There are no right or wrong responses so please answer the question as honestly as you can. | - Could be misconstrued as asking for the most important benefit seen since starting treatment - Felt the instructions were too broad and vague - Could use examples to help guide responses | Additional instructions provided along with examples. | **Instructions:** Every person seeks treatment for their own reasons and has expectations of how the treatment will improve their lives. For this questionnaire, please think about the **one treatment benefit** that would be most important to you. Please consider the following when completing this questionnaire:   1. **Be as specific as possible:** Instead of including a response that is very broad (for example, “I want to feel better”), please include a goal that is specific to you and your treatment (for example, “I want to sleep through the night”). 2. **Only include one treatment goal:** While we understand that you may have many expectations from your treatment, for the purpose of this questionnaire, please think of the **one** goal that is most important to you.   There are no right or wrong responses so please answer the question as honestly as you can. | -the use of both “treatment goal” and “treatment benefit” throughout the Baseline Questionnaire could be confusing  -difficult to nail down one treatment goal when there are multiple outcomes a participant would like to see | No change | **Instructions:** Every person seeks treatment for their own reasons and has expectations of how the treatment will improve their lives. For this questionnaire, please think about the **one treatment benefit** that would be most important to you. Please consider the following when completing this questionnaire:   1. **Be as specific as possible:** Instead of including a response that is very broad (for example, “I want to feel better”), please include a goal that is specific to you and your treatment (for example, “I want to sleep through the night”). 2. **Only include one treatment goal:** While we understand that you may have many expectations from your treatment, for the purpose of this questionnaire, please think of the **one** goal that is most important to you.   There are no right or wrong responses so please answer the question as honestly as you can. |
| Item 1 Question | **Question 1: Identifying Your Primary Treatment Goal**  What is the **one benefit** from your treatment that would be most important to you? | - Hard to pin down just one benefit - Suggested asking for most important benefit rather than “the one benefit” | Removed label above the box for question 1 and re-worded question to specifically ask for the most important benefit. | What is the **one most important benefit** you would like to see from this treatment? | - Use of both “treatment goal” and “treatment benefit” could be confusing | Inserted the label ‘Primary Treatment Goal’ above the response box | **Primary Treatment Goal:**  What is the **one most important benefit** you would like to see from this treatment? |

TGES = treatment goals evaluation scale.

Supplemental Table S4. Revised TGES – Baseline responses

| **Interview Round** | **Sample** | **Initial TGES – Baseline Response** | **Reason for Revision** | **Revised TGES – Baseline Response After Interviewer Intervention** |
| --- | --- | --- | --- | --- |
| **Version 1** | AD | Emotional wellbeing. | Misunderstood instructions | To reduce the dry skin, the itchiness, and the dead skin that flakes off. |
| AD | To have freedom from the everyday nuisance of eczema and to feel more like myself again. | Vague | [To reduce] the flaky, the flakiness. |
| AD | Cracks on hands. | No goal specifying desired change in symptom | That the cracks on my hands went away. |
| AD | Less anxiety about exposing skin to others. I want to be able to wear different clothing, other than cover myself up. | Multiple goals | Reduction in redness. |
| AD | Clearing up my hands with a permanent solution. | Vague | Reduction in cracking and peeling of the skin on the hands. |
| AD | I was tortured by my itching; I need relief to function in my life more normally. | Multiple goals | To reduce itching everywhere. |
| **Version 2** | AD | To stop the itching and flaking and to get better sleep. | Multiple goals | Reduce the itching and flaking. |
| AD | I want to be able to plan my outfits around the weather, and not how severe my skin is looking that particular day. | Vague | I want to be able to plan my outfits around the weather, and not how severe my skin is looking that particular day (specifically neck and arms). |
| AD | I would like to feel more confident and not be embarrassed by my skin, able to wear short-sleeved, sleeveless, backless shirts, and not be thinking about my skin the whole time and if people are looking at it. | Vague | To eliminate flare-ups on my face, neck, and arms in order to feel more confident wearing short sleeves, sleeveless, and backless shirts. |
| AD | Stopping the itch from a day to day. | Vague | Stopping the itch from a day to day, particularly on my arms and legs. |
| AD | Quality of life improved by minimizing the amount of itching on a daily basis. | Multiple goals | To minimize the amount of generalized itching on a daily basis. |
| AD | To find a solution to my skin issue and never have to deal with it again. | Vague | To remove the bumps, itching, and breakouts associated with my dermatitis. |
| AD | I would like to be able to not feel like I’m hot in my skin always and uncomfortable. And no scratching. | Vague | I would like to be able to feel like my skin isn’t always hot and uncomfortable. |
| AD | To have clearer skin and less irritation, itchiness, and patches/redness. | Multiple goals | To have less patches of redness. |
| Migraine | I want to have less frequent headaches and feel better daily. | Multiple goals | I want to have less frequent headaches. |
| Migraine | I don’t want to cancel plans. | Vague | I don’t want to cancel plans due to migraines. |
| Migraine | I would like reduced frequency and severity of migraines. | Multiple goals | I’d like reduced frequency of migraines. |

AD = atopic dermatitis; TGES = Treatment Goal Evaluation Scale.

Supplemental Table S5. TGES – Follow-up comprehension and responses

|  | Frequency (n/N) | | Representative Quotes (PRO Version) | |
| --- | --- | --- | --- | --- |
| Instructions | | | | |
| Interpreted as intended | 100% (26/26) | |  | |
| *Suggested revisions* | 21.4% (6/28) | |  | |
| Make the word “responses” singular | 7.1% (2/28) | | *“[…] since I was only allowed one treatment goal, it should be ‘response.’”* (version 1) | |
| Change the word “benefit” to “goal” | 6.7% (1/15)a | | *“Use benefit.”* (version 2) | |
| Remind participant of their baseline answer | 6.7% (1/15)a | | *“[…] I may not remember exactly what I wrote […]”* (version 2) | | |
| Remove “there is no right or wrong answer” | 6.7% (1/15)a | | *“[…] I will recommend changing that.”* (version 2) | |
| Reiterate that the evaluation pertains to the response on the baseline questionnaire | 16.7% (1/6)b | | *“[…] reiterating that this treatment evaluation pertains to the response that was given before […]”* (version 3) | |
| Item 1 | | | | |
| Interpreted as intended | 96.4% (27/28) | |  | |
| *Easy to respond* |  | |  | |
| Yes | 96.2% (25/26) | |  | |
| No | 3.8% (1/26) | | *“Um, I had difficulty with was this change meaningful to you.”* (version 3) | |
| *Confusion with question* |  | |  | |
| No | 84.6% (22/26) | |  | |
| Yes | 15.4% (4/26) | | *“I was thinking back to when I first sought treatment, […]”* (version 2) | |
| *Suggested revisions* | | 14.3% (4/28) | |  | |
| Revise to “your current treatment” to address ambiguity around “since you began treatment” | | 14.3% (4/28) | |  | |
| Item 1 response options | | | | |
| Interpreted as intended | 82.1% (23/28) | |  | |
| Item 1 Subquestion |  | |  | |
| Interpreted as intended | **92.9% (26/28)** | |  | |
| *Confusion with question* |  | |  | |
| No | 92.9% (26/28) | | *“I would interpret that as like has it made a difference in your day to day.”* (version 2) | |
| Yes | 7.1% (2/28) | | “[…]…I would say it doesn’t need to be asked at all because it’s already understood […]” (version 2) | |
| *Could describe the smallest amount of meaningful change* | 92.9% (26/28) | | “[…] was 50% better, that’s still meaningful to me.” (version 1) | |
| Item 2 |  | |  | | |
| Interpreted as intended | 75.0% (21/28) | |  | | |
| *Easy to respond* |  | |  | | |
| Yes | 82.1% (23/28) | |  | | |
| No | 17.9% (5/28) | | “*I feel like this is from just the very beginning. If it was more for this specific preventative treatment, I feel that it would need to say that in the instructions […]*” (version 2) | | |
| *Confusion with question* |  | |  | | |
| No | 71.4% (20/28) | |  | | |
| Yes | 28.6% (8/28) | | *“[…] meaningful change in your overall condition, that’s not part of my treatment goal, […]”* (version 1) | | |
| Item 2 response options | | | | | |
| Distinguished between response options | 92.9% (26/28) | |  | | |
| *Difficulty choosing* |  | |  | | |
| Yes | 7.1% (2/28) | | *“[…] I’m kind of like stuck between 3 and 4.”* (version 2) | | |
| No | 92.9% (26/28) | |  | | |

PRO = patient-reported outcome; TGES = Treatment Goals Evaluation Scale.

a Among participants who participated in Round 2 cognitive interviews (n=15).

b Among participants who participated in Round 1 cognitive interviews (n=6).

Supplemental Table S6. Item tracking matrix: TGES – Follow-Up

| TGES Item | Version 1 | Feedback from Interviews  (N=6) | Revisions based on feedback | Version 2 | Feedback from Interviews  (N=15) | Revisions based on feedback | Version 3  (N=7) |
| --- | --- | --- | --- | --- | --- | --- | --- |
| Overall Instructions | **Instructions:** Please read your responses to the questionnaire you completed at the beginning of treatment. Keeping those responses in mind and thinking of the **one treatment benefit** that you identified, please answer the questions below. There are no right or wrong responses, so please answer the questions as honestly as you can. | - Plural “responses” does not match Baseline instructions - Could be difficult to remember baseline answer if significant time has passed | Changed ‘those’ to ‘that’ and made ‘responses’ singular | **Instructions:** Please read your response to the questionnaire that you completed at the beginning of treatment. Keeping that response in mind and thinking of the **one treatment benefit** that you identified, please answer the questions below. There are no right or wrong responses, so please answer the questions as honestly as you can. | - No major issues reported - Some participants who mentioned a preference on “goal” or “benefit” wording in the baseline mentioned their preferences again in the follow-up | None | **Instructions:** Please read your response to the questionnaire that you completed at the beginning of treatment. Keeping that response in mind and thinking of the **one treatment benefit** that you identified, please answer the questions below. There are no right or wrong responses, so please answer the questions as honestly as you can. |
| Item 1 Question | Question 1: Meeting Your Primary Treatment Goal  Since you began treatment, to what extent have you met your **treatment goal**? Please choose only **one** of the responses below. | - Unsure of whether follow-up questionnaire was supposed to be used at the end of treatment | None | Question 1: Meeting Your Primary Treatment Goal  Since you began treatment, to what extent have you met your **treatment goal**? Please choose only **one** of the responses below. | - Ambiguity in “since you began treatment” led to confusion on whether question is asking about all treatments or current treatment - Treatment goals may change over time and make the follow-up difficult to respond to | Inserted ‘your current’ to describe treatment in the question | Question 1: Meeting Your Primary Treatment Goal  Since you began your current treatment, to what extent have you met your **treatment goal**? Please choose only **one** of the responses below. |
| Item 1 Response Options | □1 I did not meet my treatment goal.  □2 I partially met my treatment goal.  *(If this is your answer, was this change meaningful to you? □ Yes □ No)*  □3 I mostly met my treatment goal.  *(If this is your answer, was this change meaningful to you? □ Yes □ No)*  □4 I completely met my treatment goal.  *(If this is your answer, was this change meaningful to you? □ Yes □ No)* | - No issues reported | None | □1 I did not meet my treatment goal.  □2 I partially met my treatment goal. *(If this is your answer, was this change meaningful to you? □ Yes □ No)*  □3 I mostly met my treatment goal.  *(If this is your answer, was this change meaningful to you? □ Yes □ No)*  □4 I completely met my treatment goal. *(If this is your answer, was this change meaningful to you? □ Yes □ No)* | - Concept of meaningful change may not be clear to everyone - How long a respondent has been on their current treatment could impact their capacity to answer this | None | □1 I did not meet my treatment goal.  □2 I partially met my treatment goal. *(If this is your answer, was this change meaningful to you? □ Yes □ No)*  □3 I mostly met my treatment goal.  *(If this is your answer, was this change meaningful to you? □ Yes □ No)*  □4 I completely met my treatment goal.  *(If this is your answer, was this change meaningful to you? □ Yes □ No)* |
| Item 2 Question | Question 2: Meaningful Change in Your Overall Condition  Please choose only **one** response below that best describes the **change in your (*insert name of condition)* since you began treatment.** | - No issues reported | None | Question 2: Meaningful Change in Your Overall Condition  Please choose only **one** response below that best describes the **change in your (*insert name of condition)* since you began treatment.** | - Ambiguity in “since you began treatment” led to confusion on whether question is asking about all treatments or current treatment | Inserted ‘your current’ to describe treatment in the question | Question 2: Meaningful Change in Your Overall Condition  Please choose only **one** response below that best describes the **change in your (*insert name of condition)* since you began your current treatment.** |
| Item 2 Response Options | □1 My condition has worsened.  □2 My condition has not become better or worse.  □3 I have noticed an improvement, but it is not enough to be meaningful to me.  □4 I have noticed an improvement large enough to be meaningful, but not a complete improvement.  □5 I have noticed meaningful and complete improvement. | - Felt that #5 “meaningful and complete improvement” were redundant - Option 2 and 3 could be difficult to distinguish | Edited response option 2 and 5 | □1 My condition has worsened.  □2 My condition has not changed.  □3 I have noticed an improvement, but it is not enough to be meaningful to me.  □4 I have noticed an improvement large enough to be meaningful, but not a complete improvement.  □5 I have noticed complete improvement. | - Some confusion on whether improvement refers to baseline goal or condition overall | None | □1 My condition has worsened.  □2 My condition has not changed.  □3 I have noticed an improvement, but it is not enough to be meaningful to me.  □4 I have noticed an improvement large enough to be meaningful, but not a complete improvement.  □5 I have noticed complete improvement. |

TGES = treatment goals evaluation scale.

Supplemental Figure S1. Study design


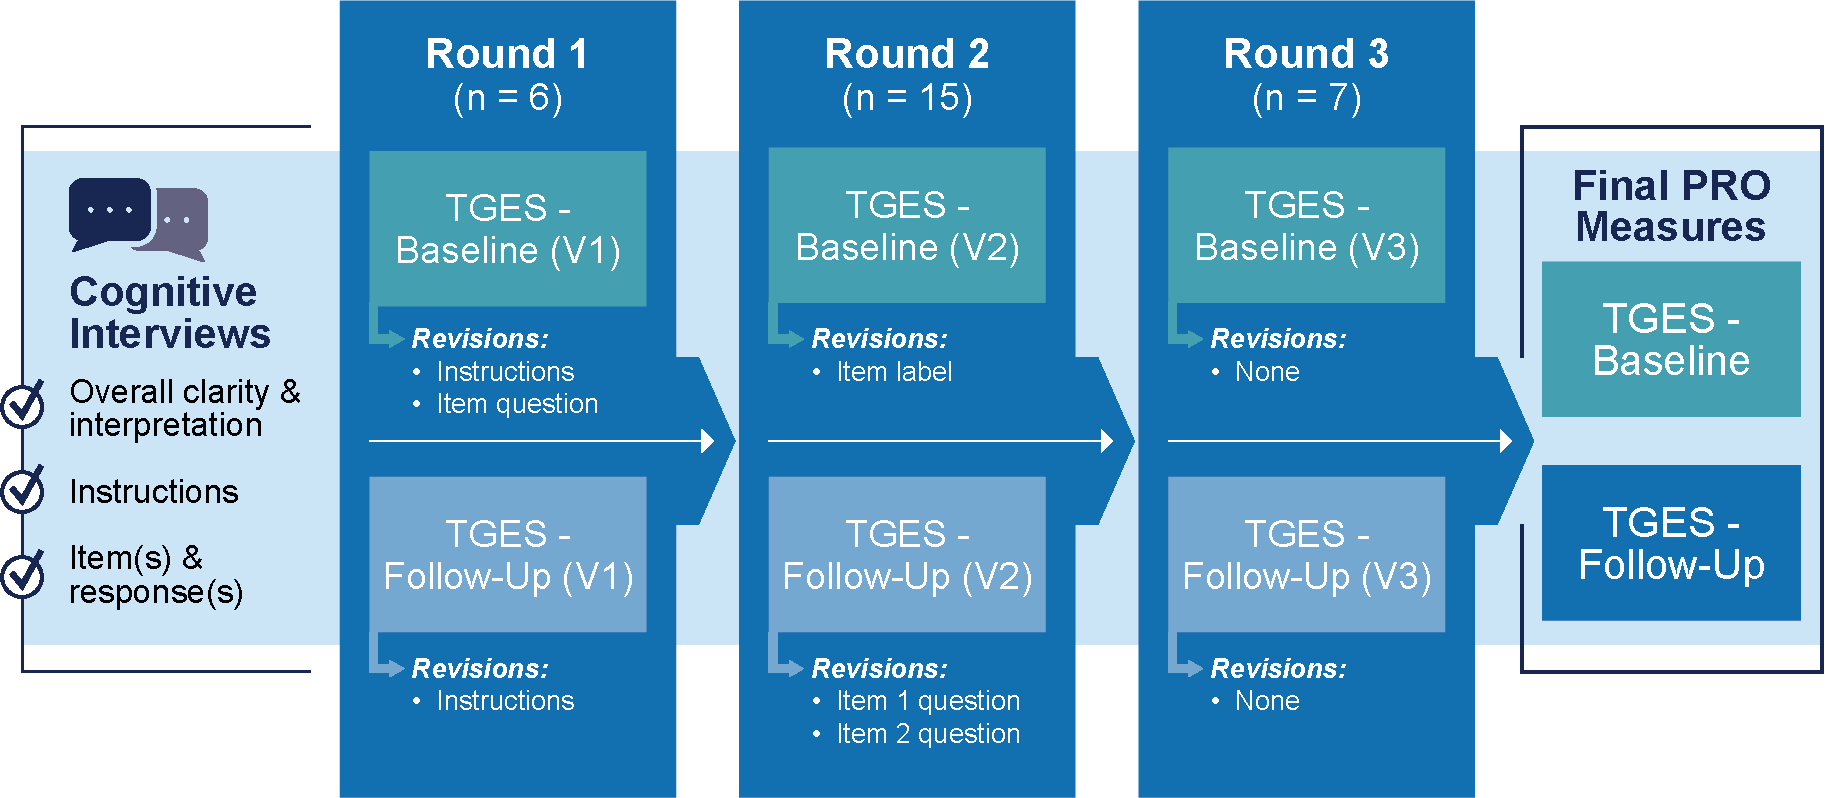


PRO = patient-reported outcome; TGES = Treatment Goals Evaluation Scale.
